# Supplementary material for: Exploring the Microbial Community Structure in the Chicken House Environment by Metagenomic Analysis
Source: MDPI journal article supplement (doi:10.3390/ani14010055), 2023-12-22
Supplement: s1 [file s1]

## Supplementary materials

### Exploring the Microbial Community Structure in the Chicken House Environment by Metagenomic Analysis

Cheng Lou<sup>a</sup>, Zhuo Chen<sup>a</sup>, Yu Bai<sup>a</sup>, Tongjie Chai<sup>b</sup>, Yuling Guan<sup>a</sup>, Bo Wu<sup>a,\*</sup>

<sup>a</sup> *Guangdong Provincial Key Laboratory of Animal Molecular Design and Precise Breeding, School of Life Science and Engineering, Foshan University, Foshan, China 528225*

<sup>b</sup> *College of Animal Science and Technology, Shandong Agricultural University, Tai'an 271000, China.*

\* **Correspondence:** wubo@fosu.edu.cn(**B.W**)

Supplementary Table S1: Evaluation statistics of sequencing data of 12 PM2.5 samples.

| Group | Sample ID | Raw data base(bp) | Clean data base(bp) | Number of Reads | GC(%)  | Q20(%)  | Q30(%)  |
|-------|-----------|-------------------|---------------------|-----------------|--------|---------|---------|
| Week1 | W1M1      | 8152873112        | 8092464193          | 27027099        | 48.83  | 98.6    | 95.79   |
| Week1 | W1M2      | 6730284254        | 6667500725          | 22264075        | 48.34  | 98.51   | 95.59   |
| Week1 | W1M3      | 6217374690        | 6164374444          | 20589878        | 48.82  | 98.51   | 95.58   |
| Week2 | W2M1      | 9388987116        | 9296881735          | 31039190        | 48.54  | 98.53   | 95.62   |
| Week2 | W2M2      | 7678724900        | 7582268150          | 25312479        | 49.63  | 98.32   | 95.13   |
| Week2 | W2M3      | 8764339944        | 8680299691          | 28996033        | 49.05  | 98.48   | 95.51   |
| Week3 | W3M1      | 10570961438       | 10450221463         | 34906464        | 48.89  | 98.49   | 95.59   |
| Week3 | W3M2      | 7936186646        | 7805794828          | 26078312        | 48.83  | 97.72   | 93.67   |
| Week3 | W3M3      | 6887104106        | 6825073894          | 22809347        | 50.25  | 98.48   | 95.54   |
| Week4 | W4M1      | 7480615758        | 7414397453          | 24764618        | 49.01  | 98.45   | 95.41   |
| Week4 | W4M2      | 6622623486        | 6561317329          | 21913112        | 49.48  | 98.43   | 95.36   |
| Week4 | W4M3      | 7838815332        | 7757828554          | 25900877        | 48.23  | 98.32   | 95.03   |
| Total |           | 94268890782       | 93298422459         | 311601484       | 587.90 | 1180.84 | 1143.82 |
| AVER  |           | 7855740898.50     | 7774868538.25       | 25966790.33     | 48.99  | 98.40   | 95.32   |

Note: Q20(%): Percentage of the base with a mass value greater than or equal to 20 in total base; Q30(%): Percentage of the base with a mass value greater than or equal to 30 in entire base; GC(%): GC content of a sample, namely the percentage of G and C type bases in total bases.

Supplementary Table S2: Number of microorganisms detected at each classification level.

| Sources  | Percentage | Phylum | Class | Order | Family | Genus | Species |
|----------|------------|--------|-------|-------|--------|-------|---------|
| Bacteria | 89.80%     | 145    | 94    | 194   | 448    | 2377  | 19374   |
| Fungi    | 1.08%      | 9      | 39    | 92    | 212    | 390   | 744     |
| Virus    | 2.06%      | 1      | 1     | 4     | 29     | 188   | 1198    |
| Archaea  | 0.49%      | 15     | 16    | 27    | 42     | 116   | 508     |
| Sum      | 93.43%     | 170    | 150   | 317   | 731    | 3,071 | 21,824  |

Supplementary Table S3: Comparison of alpha diversity index for fungi in PM2.5 samples (n=12).

| Group | Number of samples | Shannon <sup>a</sup> | Simpson <sup>a</sup> | ACE <sup>a</sup> | Chao1 <sup>a</sup> |
|-------|-------------------|----------------------|----------------------|------------------|--------------------|
| Week1 | 3                 | 1.315±0.077          | 0.611±0.036          | 200.736±8.886    | 200.037±9.297      |
| Week2 | 3                 | 1.408±0.114          | 0.610±0.013          | 221.237±54.965   | 221.083±55.127     |
| Week3 | 3                 | 1.530±0.145          | 0.623±0.055          | 167.222±25.667   | 167.143±25.729     |
| Week4 | 3                 | 1.314±0.040          | 0.491±0.014          | 146.091±10.064   | 145.549±10.038     |
| F     |                   | 2.997                | 9.877                | 3.508            | 3.491              |
| P     |                   | 0.095                | 0.005                | 0.069            | 0.07               |

Note: <sup>a</sup> All data shown were  $\bar{X} \pm S$  (mean±standard deviation). The *P* value was obtained with one-way ANOVA

Supplementary Table S4: Virus types and proportion at the family level.

| Virus Classification (Family) | Percentage (%) |
|-------------------------------|----------------|
| <i>Siphoviridae</i>           | 66.9965%       |
| <i>Myoviridae</i>             | 25.2145%       |
| <i>Podoviridae</i>            | 3.2807%        |
| <i>Adenoviridae</i>           | 0.1258%        |
| <i>Herpesviridae</i>          | 0.1223%        |
| <i>Retroviridae</i>           | 0.0815%        |
| <i>Mimiviridae</i>            | 0.0400%        |
| <i>Microviridae</i>           | 0.0397%        |
| <i>Parvoviridae</i>           | 0.0146%        |

|                          |         |
|--------------------------|---------|
| <i>Totiviridae</i>       | 0.0074% |
| <i>Ascoviridae</i>       | 0.0064% |
| <i>Caulimoviridae</i>    | 0.0058% |
| <i>Poxviridae</i>        | 0.0051% |
| <i>Phycodnaviridae</i>   | 0.0049% |
| <i>Circoviridae</i>      | 0.0041% |
| <i>Polydnaviridae</i>    | 0.0031% |
| <i>Baculoviridae</i>     | 0.0028% |
| <i>Pithoviridae</i>      | 0.0022% |
| <i>Nudiviridae</i>       | 0.0020% |
| <i>Alloherpesviridae</i> | 0.0017% |
| <i>Iridoviridae</i>      | 0.0016% |
| <i>Marseilleviridae</i>  | 0.0014% |
| <i>Ackermannviridae</i>  | 0.0011% |
| <i>Smacoviridae</i>      | 0.0010% |
| <i>Chuviridae</i>        | 0.0004% |
| <i>Metaviridae</i>       | 0.0003% |
| <i>Geminiviridae</i>     | 0.0003% |
| <i>Flaviviridae</i>      | 0.0002% |
| <i>Genomoviridae</i>     | 0.0002% |
| <i>Unclassified</i>      | 4.0325% |

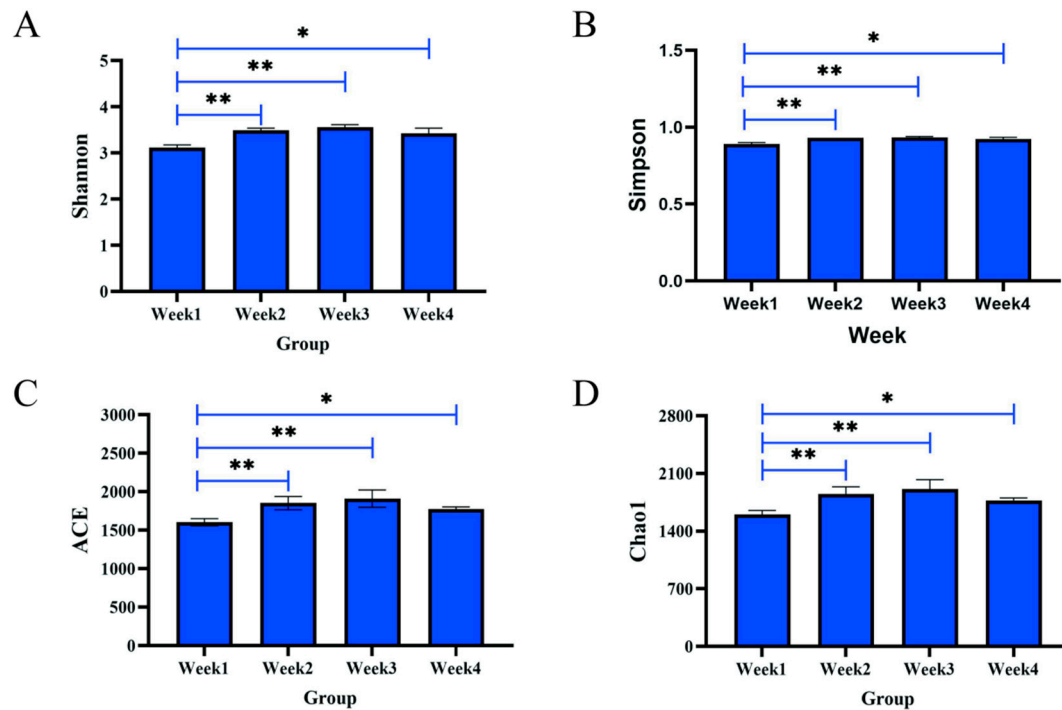

Supplementary Figure S1: Alpha diversity based on species abundance at the genus level.

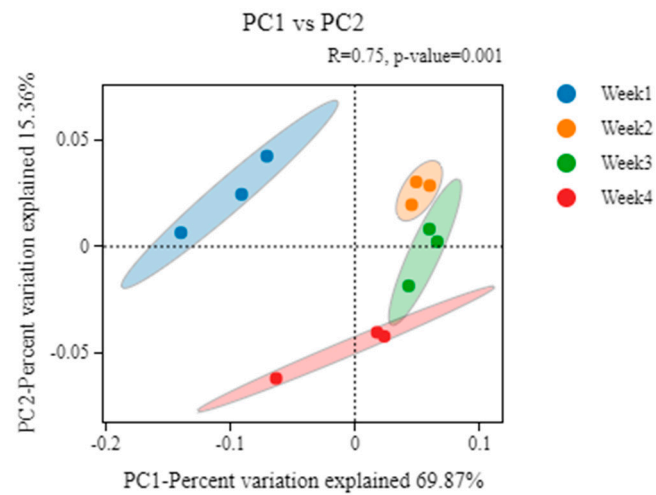

Supplementary Figure S2: Principal coordinate analysis plot generated using abundance at different taxonomic levels based on Bray - Curtis dissimilarities. Each plot represents a sample.

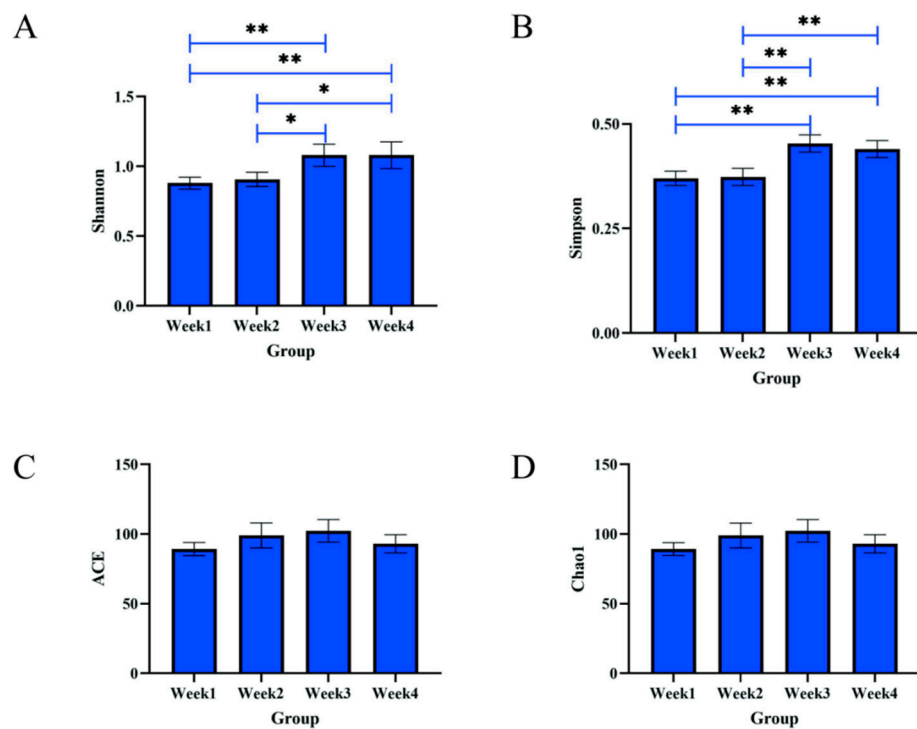

Supplementary Figure S3: Alpha diversity is based on species abundance at the genus level.

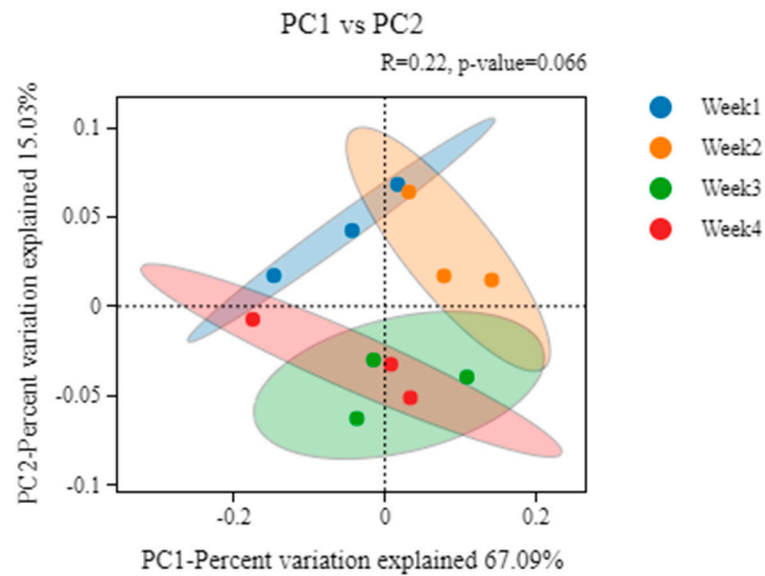

Supplementary Figure S4: PCoA plot generated using abundance at different taxonomic levels based on Bray–Curtis dissimilarities.

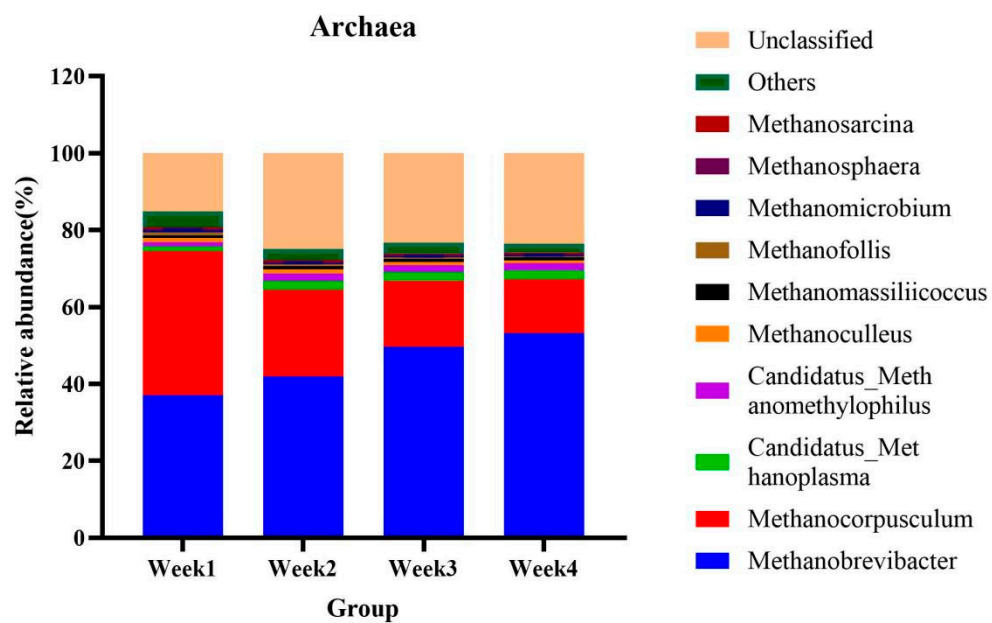

Supplementary Figure S5: The top 10 most abundant Archaea in PM2.5 samples.

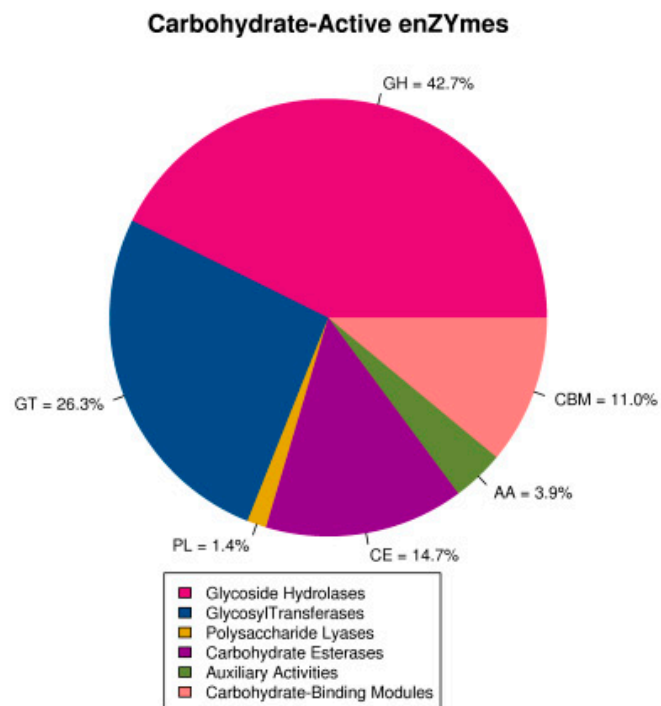

Supplementary Figure S6: Taxonomy and relative abundances of the classifiable carbohydrate-active enzyme identified in the microbiota of PM<sub>2.5</sub> during four weeks.
